# Supplementary material for: A Survival Tree of Advanced Melanoma Patients with Brain Metastases Treated with Immune Checkpoint Inhibitors
Source: MDPI journal article supplement (doi:10.3390/cancers15112922), 2023-05-26
Supplement: s1 [file s1]

## SUPPLEMENTARY FILES

### Supplementary Table S1 – Patient and tumor characteristics

Patient and tumor characteristics of patients with melanoma BM at the time of diagnosis of advanced melanoma.

[illegible]

|                                               |             |            |
|-----------------------------------------------|-------------|------------|
| <b>Liver metastases</b>                       | No          | 934 (73.1) |
|                                               | Yes         | 332 (26.0) |
|                                               | Unknown     | 12 (0.9)   |
| <b>Organ sites</b>                            | <3          | 534 (41.8) |
|                                               | ≥3          | 739 (57.8) |
|                                               | Unknown     | 5 (0.4)    |
| <b>Mutation status</b>                        | <i>BRAF</i> | 768 (60.1) |
|                                               | <i>NRAS</i> | 258 (20.2) |
| <b>Year of diagnosis of advanced melanoma</b> | 2013        | 96 (7.5)   |
|                                               | 2014        | 108 (8.5)  |
|                                               | 2015        | 173 (13.5) |
|                                               | 2016        | 151 (11.8) |
|                                               | 2017        | 201 (15.7) |
|                                               | 2018        | 226 (17.7) |
|                                               | 2019        | 203 (15.9) |
|                                               | 2020        | 120 (9.4)  |

## Supplementary Table S2 – Median Overall Survival

Median overall survival by treatment node.

| Treatment Node number | Number of patients | Median Overall Survival | Lower 95% CI | Upper 95% CI |
|-----------------------|--------------------|-------------------------|--------------|--------------|
| 1                     | 1,022              | 12.2                    | 10.6         | 14.2         |
| 2                     | 641                | 15.4                    | 14.1         | 19.5         |
| 3                     | 273                | 23.1                    | 17.4         | 33.2         |
| 4                     | 223                | 31.8                    | 23.0         | 42.5         |
| 5                     | 184                | 35.7                    | 26.3         | Not Reached  |
| 6                     | 48                 | Not Reached             | 42.5         | Not Reached  |
| 7                     | 136                | 26.3                    | 21.3         | 40.1         |
| 8                     | 94                 | 35.7                    | 23.1         | Not Reached  |
| 9                     | 42                 | 10.0                    | 7.6          | 34.2         |
| 10                    | 39                 | 12.6                    | 7.2          | Not Reached  |
| 11                    | 50                 | 12.5                    | 7.6          | 18.9         |
| 12                    | 368                | 12.0                    | 10.2         | 14.8         |
| 13                    | 226                | 13.9                    | 11.0         | 17.6         |
| 14                    | 127                | 21.4                    | 12.7         | 30.0         |
| 15                    | 69                 | 30.0                    | 16.1         | Not Reached  |
| 16                    | 58                 | 12.2                    | 7.4          | 27.4         |
| 17                    | 99                 | 11.0                    | 7.5          | 14.1         |
| 18                    | 142                | 9.3                     | 6.8          | 14.2         |
| 19                    | 73                 | 17.8                    | 8.5          | 24.9         |
| 20                    | 69                 | 6.1                     | 4.4          | 11.5         |
| 21                    | 381                | 5.1                     | 4.0          | 7.3          |
| 22                    | 318                | 6.7                     | 4.6          | 10.7         |
| 23                    | 194                | 11.0                    | 6.3          | 18.2         |
| 24                    | 116                | 18.2                    | 12.0         | 24.3         |
| 25                    | 48                 | 25.0                    | 19.9         | Not Reached  |
| 26                    | 68                 | 14.8                    | 9.7          | 21.9         |
| 27                    | 78                 | 4.7                     | 3.5          | 9.0          |
| 28                    | 124                | 3.9                     | 2.9          | 6.7          |
| 29                    | 68                 | 6.8                     | 3.4          | 16.8         |
| 30                    | 56                 | 2.9                     | 1.7          | 4.4          |
| 31                    | 63                 | 2.7                     | 2.4          | 4.7          |

## SUPPLEMENTARY METHODS

### Survival tree analysis

Survival tree analysis is used to classify samples with clinicopathological information based on the difference between survival probabilities at certain time intervals. All clinicopathologic parameters were used as classifiers.

Survival tree analysis was performed using the following steps:

1. For each of the classifiers ( $C_i$ ):
  - a. If the classifier is a numeric variable,
    - i. For each possible weight of the classifier as a cut-off ( $c$ ):
      1. Obtain two subsets of the samples.
        - a. Samples having weights  $<$  cut-off weight
        - b. Or samples having weights  $\geq$  cut-off weight
      2. Obtain survival probabilities for both the subsets.
      3. Compare the survival probabilities using logrank test and obtain logrank statistic ( $LRC_{i,c}$ ).
    - ii. Obtain the optimum cut-off  $c$  ( $oc_i$ ) for which logrank statistic  $LRC_{i,c}$  is maximum. Assign maximum of  $LRC_{i,c}$  as  $max\_LRC_i$ .
  - b. If the classifier is a categorical variable,
    - i. For each possible combination of different levels of the classifier:
      1. Obtain two subsets of the samples A and B.
      2. Obtain survival probabilities for both the subsets.
      3. Compare the survival probabilities using logrank test and obtain logrank statistic ( $LRC_{i,AB}$ ).

- ii. Obtain the optimum combination of levels in two subsets A, B (oc<sub>i</sub>) for which logrank statistic  $LRC_{i,AB}$  is maximum. Assign maximum of  $LRC_{i,AB}$  as  $\max\_LRC_i$ .
2. Obtain the most significant classifier along with the optimum cut-off/combination of levels (oc) for which  $\max\_LRC_i$  is maximum among all classifiers.
3. Classify the samples into two subsets (subset\_1 and subset\_2) using the most significant classifier and optimum cut-off/combination of levels.
4. In each of the subsets of the dataset, repeat steps 1,2 & 3 till the following constraints are maintained.
  - a. Number of samples in subset\_1 + number of samples in subset\_2  $\geq 100$
  - b. number of uncensored events in subset\_1 + number of uncensored events in subset\_2  $\geq 50$
  - c. number of samples in subset\_1 or number of samples in subset\_2  $\geq 34$

Thereafter, 10,000 iterations of the above 5 steps were performed using random 80% of the samples each time to investigate robustness of the significance of the classifiers obtained from survival tree analysis mentioned above.

To assess the goodness-of-fit of the survival tree, the following steps were conducted:

1. A new variable called survival cohorts was created to store the terminal node number in the survival tree of each sample.
2. Univariate Cox regression with this new variable survival cohorts as a predictor was performed to assess its association with OS.
3. Concordance statistic for this Cox regression model was obtained to evaluate the classification power of the survival tree.

To quantify the robustness of the survival tree, the following steps were conducted:

1. Survival tree analysis was conducted 10,000 times using random 80% of the samples each time.

2. For the survival tree with all samples

a. For each classifier  $C$

- i.  $NOS\_node_{C,n}$  was obtained as the number of samples present in node  $n$  where  $C$  was the most significant classifier.
- ii.  $Max\_NOS\_node_C$  was obtained as maximum of  $NOS\_node_{C,n}$ .
- iii.  $R\_all\_samples\_survival\_tree_C$  was obtained as rank of  $Max\_NOS\_node_C$ .

3. For each of the 10,000 iterations  $i$

a. For each classifier  $C$

- i.  $NOS\_node_{C,n}$  was obtained as the number of samples present in node  $n$  where  $C$  was the most significant classifier.
- ii.  $Max\_NOS\_node_C$  was obtained as maximum of  $NOS\_node_{C,n}$ .

b.  $Robustness\_statistic_i$  was obtained as the Pearson correlation coefficient between  $Max\_NOS\_node_{C,i}$  and  $Max\_NOS\_node_C$

The robustness of the survival tree was presented by the median of  $Robustness\_statistic_i$ .
